# Supplementary material for: Eumelanin and pheomelanin are predominant pigments in bumblebee (Apidae: Bombus) pubescence
Source: PubMed Central journal article supplement (PMC5445944; doi:10.7717/peerj.3300), 2017-05-24

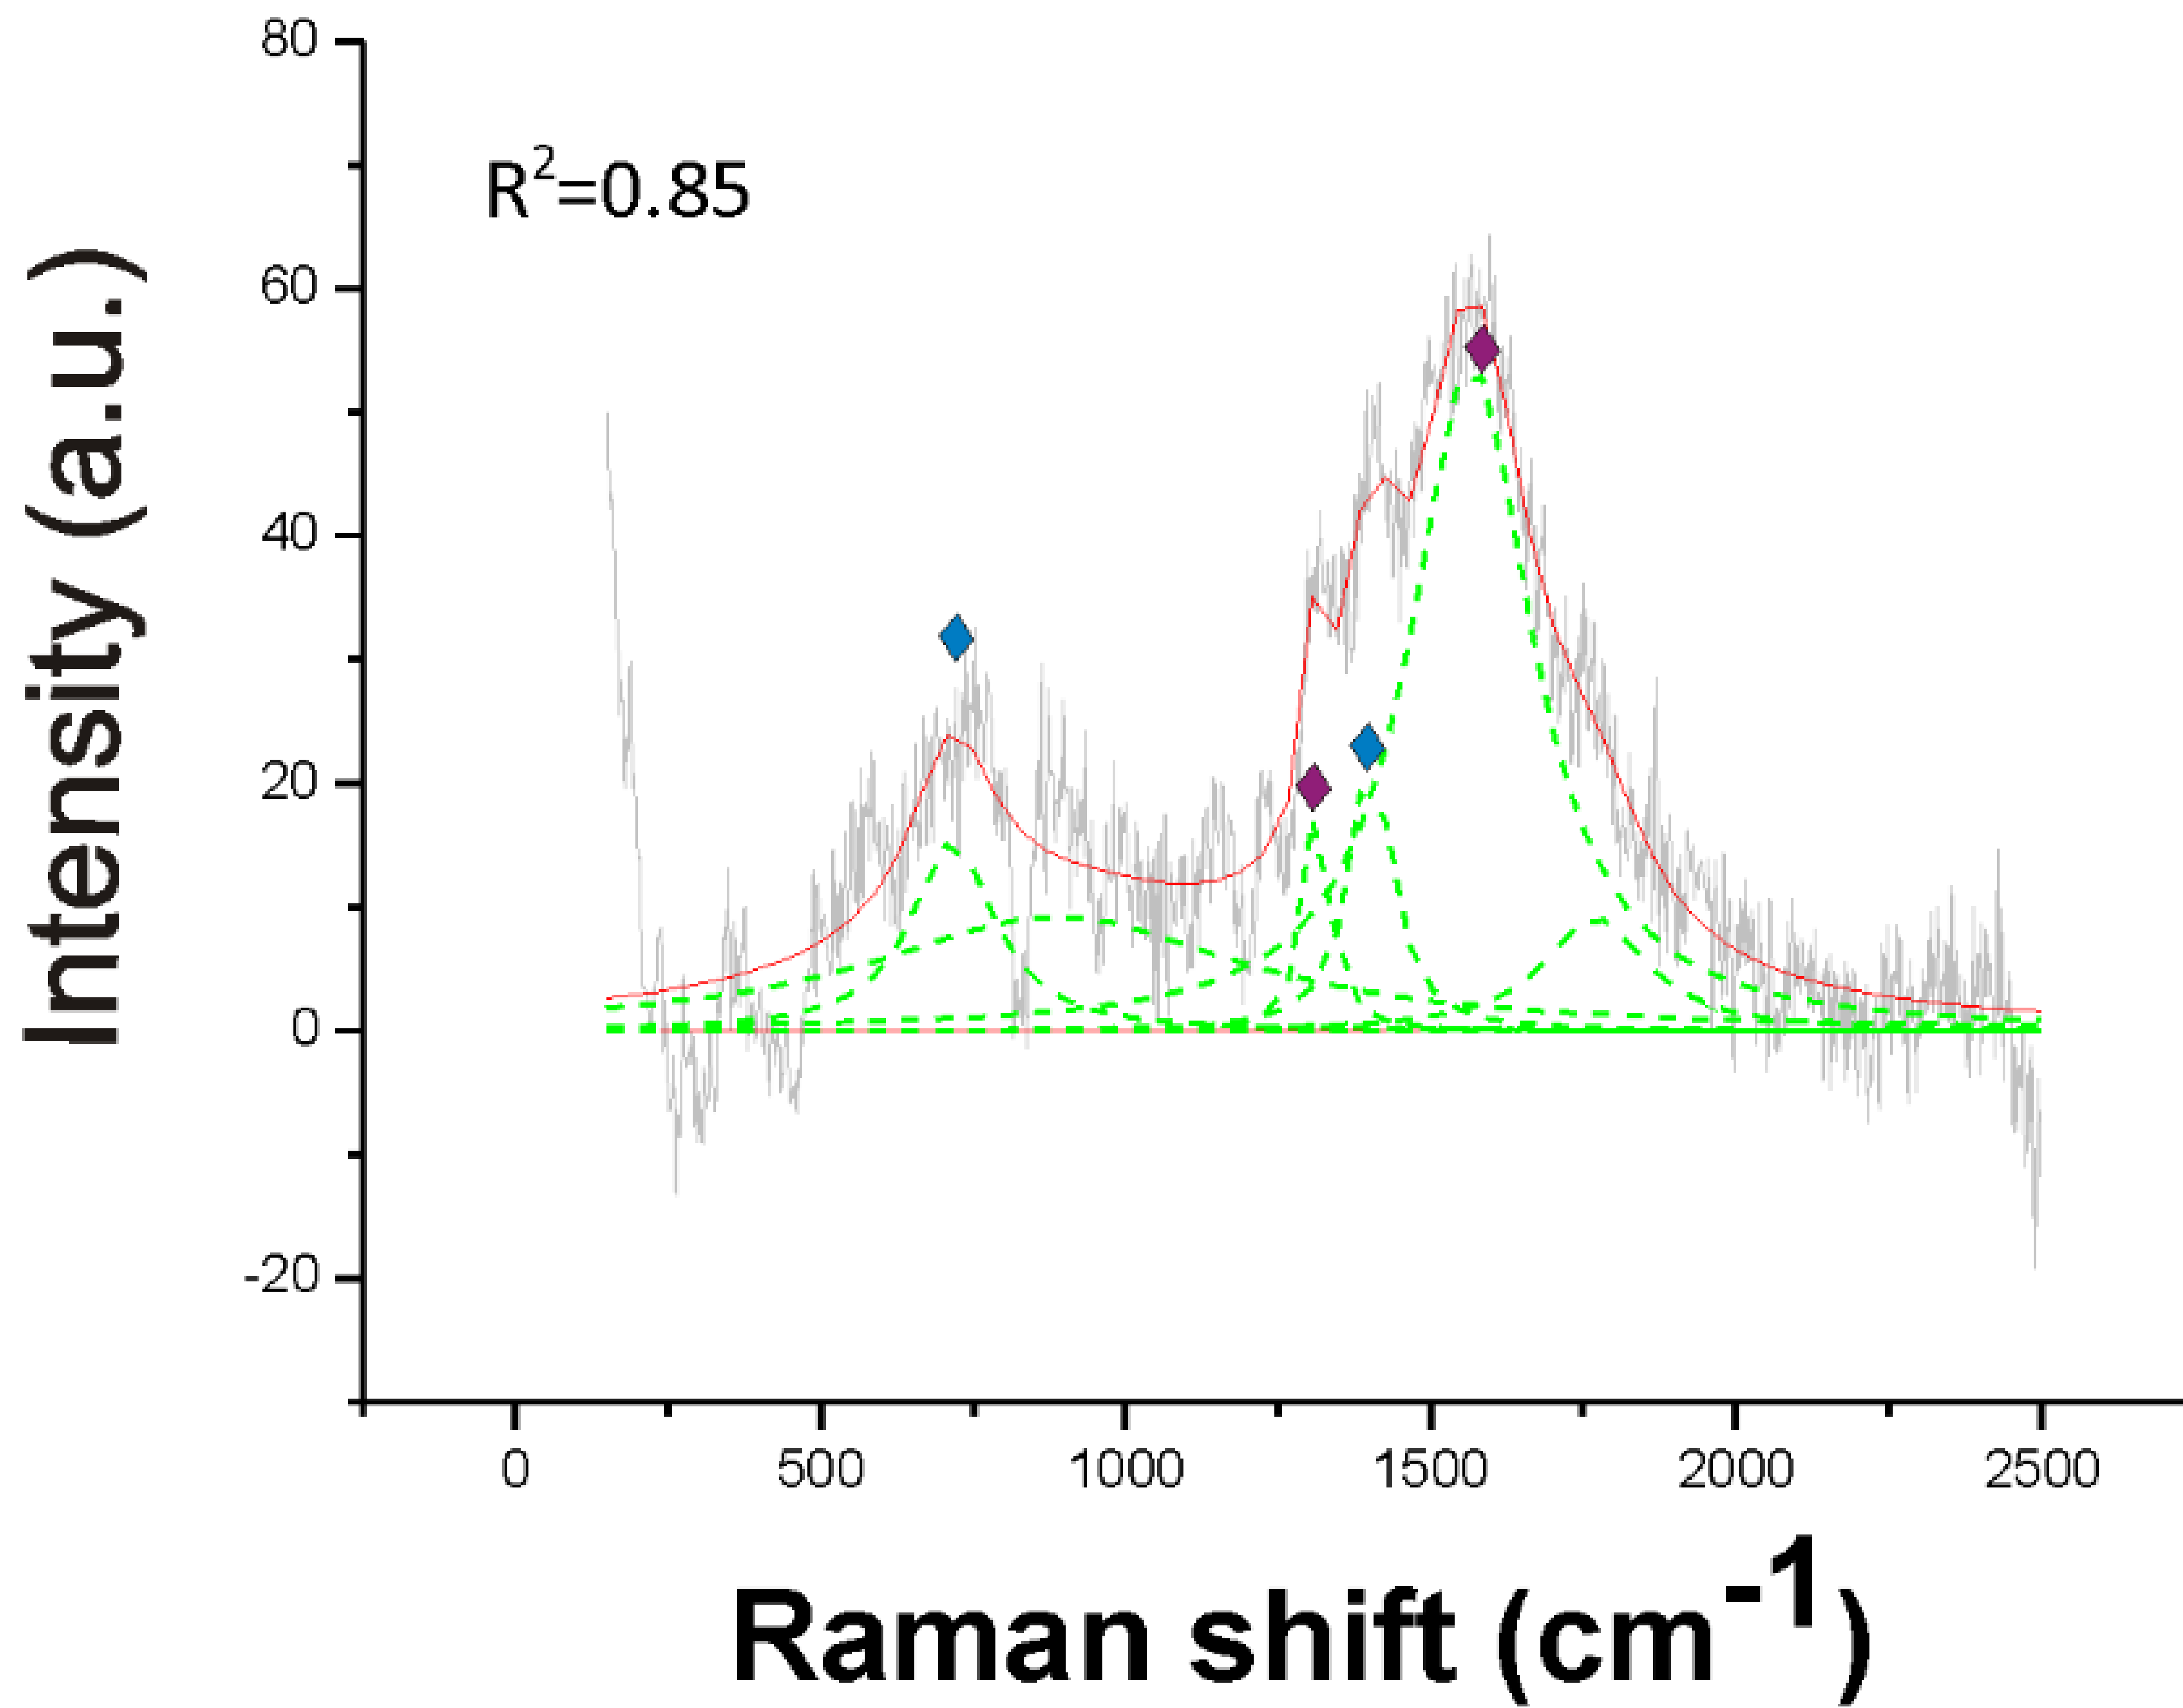

Supplement: peerj-05-3300-s002.pdf [file peerj-05-3300-s002.pdf]
